# Supplementary material for: CMIP and ATP2C2 Modulate Phonological Short-Term Memory in Language Impairment
Source: PubMed Central journal article supplement (PMC2725236; doi:10.1016/j.ajhg.2009.07.004), 2009-08-14
Supplement: mmc1.pdf [file mmc1.pdf]

## **Supplemental Data**

### ***CMIP* and *ATP2C2* Modulate Phonological Short-Term**

#### **Memory in Language Impairment**

**Dianne F. Newbury, Laura Winchester, Laura Addis, Silvia Paracchini, Lyn-Louise Buckingham, Ann Clark, Wendy Cohen, Hilary Cowie, Katharina Dworzynski, Andrea Everitt, Ian M. Goodyer, Elizabeth Hennessy, A. David Kindley, Laura L. Miller, Jamal Nasir, Anne O'Hare, Duncan Shaw, Zoe Simkin, Emily Simonoff, Vicky Slonims, Jocelyne Watson, Jiannis Ragoussis, Simon E. Fisher, Jonathon R. Seckl, Peter J. Helms, Patrick F. Bolton, Andrew Pickles, Gina Conti-Ramsden, Gillian Baird, Dorothy V.M. Bishop, and Anthony P. Monaco**

### FIGURE S1 – Q-Q plots for SLIC genotyping

Dots represent observed chi2 against expected chi2 distribution, lines represent lines of best fit for the data shown. Dashed line represents line of best fit for QTDT, dotted line represents line of best fit for case-control and solid line represents the expected chi2 distribution. The correlation between expected and observed chi2 ( $R^2$ ) was 0.9928 for the QTDT analyses and 0.9825 for the case-control analyses.

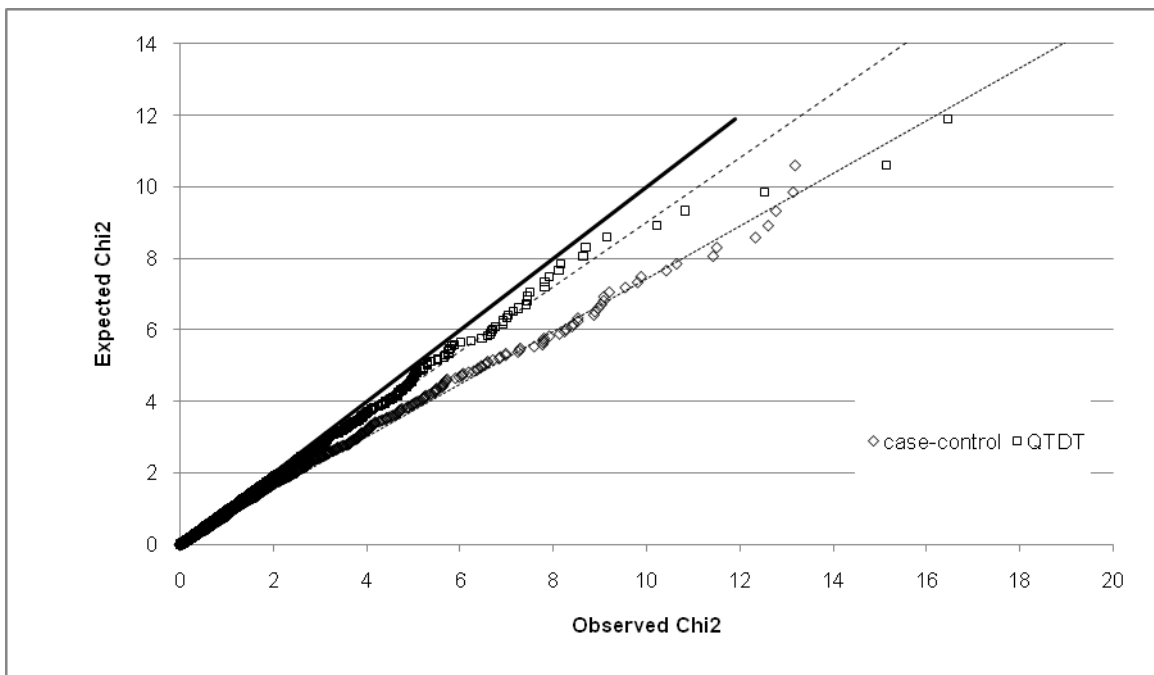

**FIGURE S2 – Linkage disequilibrium between *CMIP* and *ATP2C2* in SLIC samples**

LD between *CMIP* and *ATP2C2* in the SLIC samples. The arrows indicate the position of each gene, the triangles indicate the block of association found in each gene and the boxed region represents the region of LD between the 2 association blocks. LD is plotted as  $r^2$  given by Haploview. Black squares show pairs of SNPs in perfect correlation ( $r^2=1$ ), white squares represent pairs of SNPs with no correlation ( $r^2=0$ ) and grey squares represent an intermediate level of correlation ( $0 < r^2 < 1$ ).

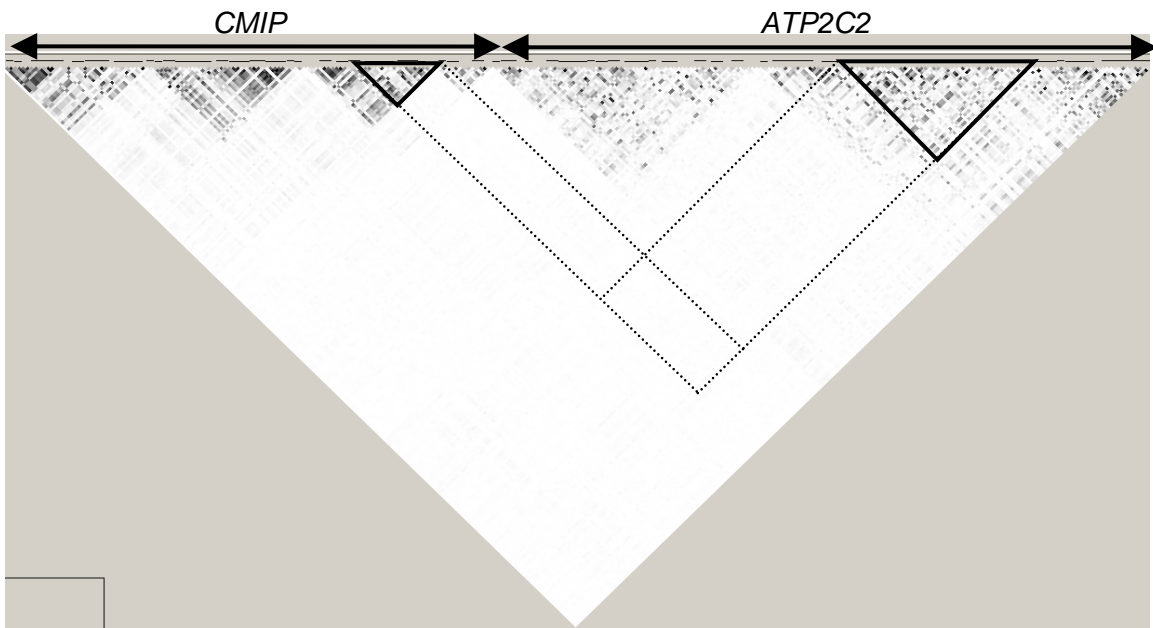

## **FIGURE S3 – Effects of *CMIP* and *ATP2C2* covariates upon linkage and association**

The contribution of specific SNP variants to the level of linkage and association seen in the SLIC cohort was assessed by calculating the number of putative risk alleles carried at rs6564903 (*CMIP*) or rs11860694 (*ATP2C2*) for each individual. These factors were then included independently as covariates within the linkage or association model as appropriate.

Linkage was assessed within MERLIN using a variance components model with nonword repetition as a quantitative measure. Association analyses were repeated within QTDT and PLINK as appropriate.

### **a – The effect of *CMIP* and *ATP2C2* covariates upon linkage**

It can be seen that the 2 covariates affect opposite ends of the linkage peak. Whilst the addition of a *CMIP* covariate reduces the linkage at the distal end of the peak, the *ATP2C2* covariate reduces that at the proximal part of the linkage peak.

### **b – The effect of *CMIP* and *ATP2C2* covariates upon association**

Quant – quantitative analysis. CC – case-control analysis. Each association analysis for each SNP is shown with no covariates (NoCov), a *CMIP* covariate (*CMIPcov*, rs6564903) and an *ATP2C2* covariate (*ATP2C2cov*, rs11860694). The *CMIP* covariate decreases the evidence for association at *CMIP* SNPs but does not have such an effect upon *ATP2C2* SNPs and the *ATP2C2* covariate decreases association at *ATP2C2* associated SNPs but not at *CMIP* associated SNPs.

**FIGURE S3 cont. – Effects of *CMIP* and *ATP2C2* covariates upon linkage and association**

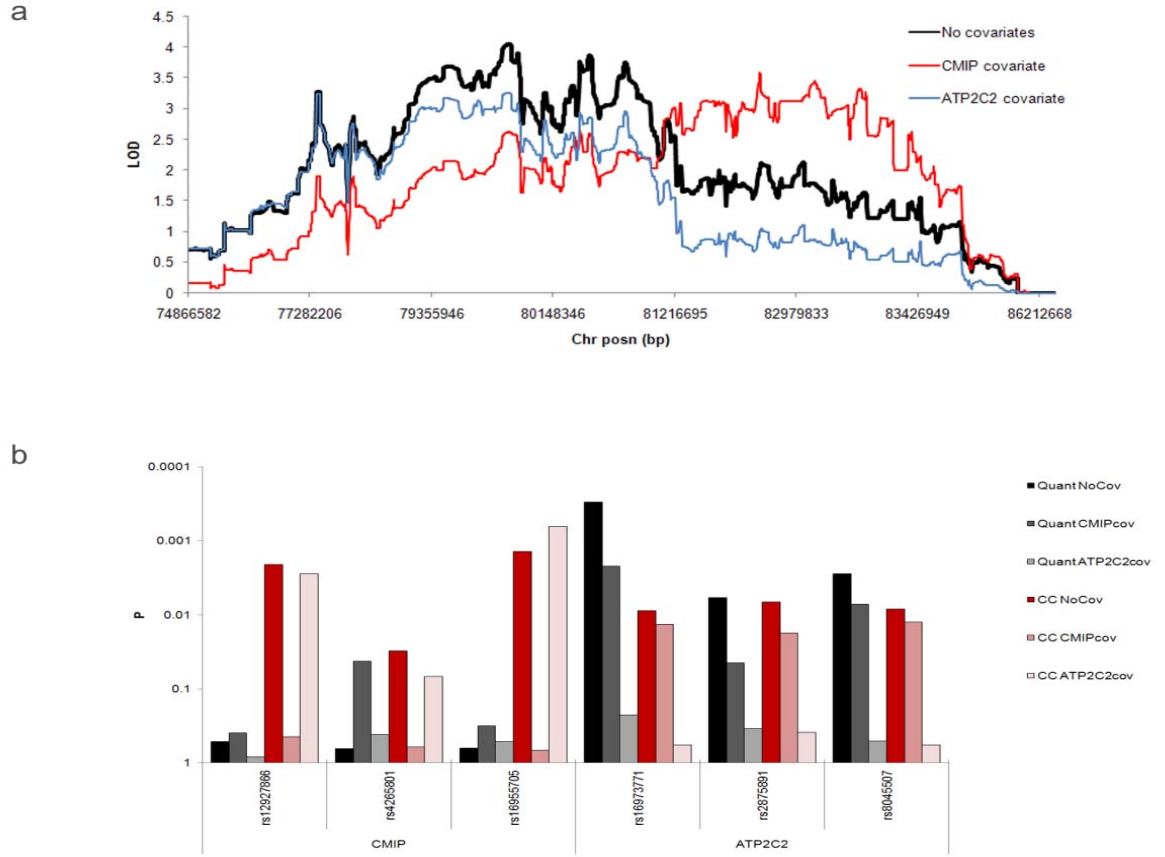

**TABLE S1 – SNP coverage gene by gene**

For each gene, the size of the gene, the number of SNPs typed across the gene and the average SNP spacing within the gene are given

| <b>Gene</b>   | <b>Size (bp)</b> | <b>Total No SNPs</b> | <b>Average SNP Spacing (bp)</b> |
|---------------|------------------|----------------------|---------------------------------|
| CNTNAP4       | 288,960          | 75                   | 3853                            |
| NUDT7         | 26,744           | 15                   | 1783                            |
| VAT1L         | 198,519          | 88                   | 2256                            |
| CLEC3A        | 16,556           | 4                    | 4139                            |
| WWOX          | 1,120,014        | 99                   | 11313                           |
| MAF           | 13,877           | 3                    | 4626                            |
| DYNLRB2       | 16,688           | 6                    | 2781                            |
| CDYL2         | 207,500          | 70                   | 2964                            |
| C16orf61      | 37,802           | 11                   | 3437                            |
| CENPN         | 23,385           | 7                    | 3341                            |
| ATMIN         | 18,494           | 4                    | 4624                            |
| C16orf46      | 30,771           | 7                    | 4396                            |
| GCSH          | 21,052           | 2                    | 10526                           |
| PKD1L2        | 126,492          | 72                   | 1757                            |
| BCMO1         | 59,452           | 19                   | 3129                            |
| GAN           | 72,231           | 26                   | 2778                            |
| <i>CMIP</i>   | 273,593          | 146                  | 1874                            |
| PLCG2         | 185,970          | 92                   | 2021                            |
| HSPC105       | 20,843           | 5                    | 4169                            |
| HSD17B2       | 70,281           | 19                   | 3699                            |
| MPHOSPH6      | 29,063           | 7                    | 4152                            |
| CDH13         | 1,176,622        | 75                   | 15688                           |
| HSBP1         | 12,002           | 4                    | 3001                            |
| MLYCD         | 24,058           | 4                    | 6015                            |
| OSGIN1        | 24,266           | 6                    | 4044                            |
| NECAB2        | 41,143           | 12                   | 3429                            |
| SLC38A8       | 39,374           | 21                   | 1875                            |
| MBTPS1        | 70,149           | 26                   | 2698                            |
| HSDL1         | 29,877           | 4                    | 7469                            |
| LRRC50        | 39,660           | 11                   | 3605                            |
| TAF1C         | 16,202           | 6                    | 2700                            |
| ADAD2         | 13,029           | 7                    | 1861                            |
| KCNG4         | 24,534           | 13                   | 1887                            |
| WFDC1         | 42,050           | 22                   | 1911                            |
| <i>ATP2C2</i> | 102,661          | 150                  | 684                             |
| KIAA1609      | 35,321           | 21                   | 1682                            |
| COTL1         | 59,466           | 44                   | 1352                            |
| KLHL36        | 20,786           | 3                    | 6929                            |
| USP10         | 86,973           | 36                   | 2416                            |
| CRISPLD2      | 96,530           | 49                   | 1970                            |
| ZDHHC7        | 44,070           | 10                   | 4407                            |

**TABLE S1 cont – SNP coverage gene by gene**

| <b>Gene</b>  | <b>Size (bp)</b> | <b>Total No SNPs</b> | <b>Average SNP Spacing (bp)</b> |
|--------------|------------------|----------------------|---------------------------------|
| KIAA0513     | 73,419           | 28                   | 2622                            |
| FAM92B       | 21,150           | 5                    | 4230                            |
| KIAA0182     | 71,782           | 14                   | 5127                            |
| GINS2        | 18,308           | 5                    | 3662                            |
| C16orf74     | 50,566           | 7                    | 7224                            |
| COX4NB       | 27,916           | 8                    | 3490                            |
| COX4I1       | 14,412           | 1                    | 14412                           |
| IRF8         | 30,438           | 19                   | 1602                            |
| LOC732275    | 20,830           | 10                   | 2083                            |
| FOXF1        | 10,938           | 2                    | 5469                            |
| MTHFSD       | 32,060           | 13                   | 2466                            |
| FOXC2        | 8,679            | 1                    | 8679                            |
| FOXL1        | 10,190           | 1                    | 10190                           |
| FBXO31       | 61,422           | 14                   | 4387                            |
| MAP1LC3B     | 19,579           | 1                    | 19579                           |
| ZCCHC14      | 92,609           | 14                   | 6615                            |
| JPH3         | 102,263          | 32                   | 3196                            |
| LOC100129637 | 14,542           | 8                    | 1818                            |

**TABLE S2 - Association of *CMIP* and *ATP2C2* with additional language measures**

Mean, standard deviations and correlation to nonword repetition (NWRcorr) are given for each trait within both the SLIC and replication samples. The correlation between sib pairs (Sibcorr) is also given for the SLIC samples. A single marker was analysed for *ATP2C2* (rs16973771) and *CMIP* (rs4265801) for each cohort using a family-based quantitative association analysis for the SLIC cohort and an allelic test of quantitative association for the ALSPAC replication cohort.

NT= not tested

CCC – Children’s Communication Checklist. The pragmatic composite is provided by the sum of the inappropriate initiation, coherence, stereotyped conversation, use of context and rapport scales.

WISC - Wechsler Intelligence Scale for Children. The verbal and non-verbal IQ scores are composites of the verbal and non-verbal subtests respectively. The full IQ score is derived from all subtests.

CELF - Clinical Evaluation of Language Fundamentals. The receptive language score and expressive language score are the sum of the receptive and expressive subtests respectively. These composites can then be added to form a Total Language Score.

NWR – nonword repetition. Note that SLIC individuals completed a 28-item nonword repetition test (population mean, 100, SD, 15) whilst ALSPAC individuals completed a shortened 12-item version of this NWR test (hence the variation in means).

WOLD - Wechsler Objectives of Language Dimensions.

Note that the reading tests used by each cohort differed (hence the variation in means).

The SLIC cohort completed the Wechsler Objective Reading Dimensions (WORD), while ALSPAC completed the Nunes and Bryant reading test.



**TABLE S2 cont. - Association of *CMIP* and *ATP2C2* with additional language measures**

| Battery | Scale          | Test                             | SLIC |        |       |             |             |                 |               | ALSPAC |        |       |             |                 |               |
|---------|----------------|----------------------------------|------|--------|-------|-------------|-------------|-----------------|---------------|--------|--------|-------|-------------|-----------------|---------------|
|         |                |                                  | N    | Mean   | SD    | Sib<br>Corr | NWR<br>corr | ATP2C2<br>assoc | CMIP<br>assoc | N      | Mean   | SD    | NWR<br>corr | ATP2C2<br>assoc | CMIP<br>assoc |
| CCC     |                | Pragmatic (Linguistic) composite | 103  | 141.08 | 14.97 | 0.11        | 0.34        | 0.7093          | -0.2137       | 658    | 141.16 | 5.89  | 0.05        | 0.5278          | -0.4233       |
| CCC     | Linguistic     | Coherence                        | 101  | 30.05  | 5.14  | 0.03        | 0.35        | 0.5792          | -0.3115       | 658    | 33.57  | 2.29  | 0.08        | 0.7756          | 0.8538        |
| CCC     | Linguistic     | Use of conversational context    | 100  | 27.70  | 3.70  | -0.06       | 0.28        | 0.9793          | -0.1241       | 658    | 27.72  | 2.11  | 0.04        | 0.3394          | -0.2954       |
| CCC     | Linguistic     | Conversational rapport           | 103  | 30.50  | 3.40  | 0.04        | 0.31        | 0.6979          | 0.2836        | 658    | 31.19  | 2.39  | -0.01       | -0.2916         | -0.1287       |
| CCC     | Linguistic     | Inappropriate initiation         | 102  | 26.61  | 2.95  | 0.44        | 0.12        | 0.3148          | 0.2273        | 658    | 24.39  | 2.72  | 0.04        | 0.5905          | 0.6755        |
| CCC     | Linguistic     | Speech                           | 101  | 30.54  | 4.94  | -0.13       | 0.61        | 0.7417          | 0.5000        | 656    | 35.07  | 2.11  | 0.14        | -0.1292         | -0.9686       |
| CCC     | Linguistic     | Sterotyped Conversation          | 103  | 26.39  | 3.35  | 0.22        | 0.17        | 0.6690          | 0.5353        | 658    | 24.28  | 2.46  | -0.02       | 0.3919          | -0.8555       |
| CCC     | Linguistic     | Syntax                           | 75   | 29.92  | 2.40  | 0.08        | 0.42        | 0.8974          | -0.8995       | 657    | 31.68  | 0.65  | 0.07        | -0.8347         | -0.5602       |
| CCC     | Non-linguistic | Interests                        | 101  | 31.43  | 2.11  | 0.10        | -0.07       | 0.5203          | 0.7843        | NT     |        |       |             |                 |               |
| CCC     | Non-linguistic | Social relationships             | 102  | 30.98  | 3.23  | -0.07       | 0.20        | 0.3327          | -0.4758       | NT     |        |       |             |                 |               |
| WISC    |                | Full IQ                          | 368  | 95.39  | 16.77 | 0.21        | 0.36        | -0.1321         | -0.5501       | 492    | 103.26 | 13.94 | 0.26        | -0.1479         | -0.6764       |
| WISC    |                | Verbal IQ                        | 368  | 94.45  | 17.02 | 0.20        | 0.43        | -0.0805         | -0.9328       | 494    | 104.55 | 15.62 | 0.31        | -0.4648         | -0.773        |
| WISC    | Verbal         | Arithmetic                       | 353  | 8.73   | 3.56  | 0.16        | 0.38        | -0.1976         | -0.9466       | 495    | 10.05  | 3.86  | 0.25        | -0.8531         | -0.2074       |
| WISC    | Verbal         | Comprehension                    | 353  | 8.44   | 3.37  | 0.08        | 0.33        | <b>-0.0328</b>  | 0.8585        | 491    | 10.75  | 3.71  | 0.08        | 0.8965          | -0.8899       |
| WISC    | Verbal         | Digit span                       | 352  | 7.80   | 3.15  | 0.17        | 0.49        | -0.0836         | 0.7891        | 484    | 9.90   | 2.99  | 0.36        | -0.3878         | -0.4395       |
| WISC    | Verbal         | Information                      | 327  | 9.15   | 3.68  | 0.21        | 0.39        | -0.1123         | 0.8838        | 495    | 10.66  | 3.13  | 0.26        | -0.9564         | 0.4793        |
| WISC    | Verbal         | Similarities                     | 353  | 9.78   | 3.55  | 0.30        | 0.37        | -0.1481         | 0.8208        | 495    | 11.86  | 3.97  | 0.22        | -0.3697         | 0.6119        |
| WISC    | Verbal         | Vocabulary                       | 353  | 8.79   | 3.18  | 0.25        | 0.35        | <b>-0.0399</b>  | -0.8050       | 492    | 10.53  | 4.17  | 0.27        | -0.3041         | -0.5808       |
| WISC    |                | Performance (nonverbal) IQ       | 385  | 97.76  | 17.54 | 0.17        | 0.20        | -0.5433         | -0.3097       | 492    | 100.89 | 14.47 | 0.08        | -0.08312        | -0.5608       |
| WISC    | Performance    | Block design                     | 370  | 9.67   | 3.38  | 0.29        | 0.14        | -0.7783         | -0.2441       | 493    | 11.01  | 3.63  | 0.16        | 0.2880          | -0.9002       |
| WISC    | Performance    | Coding                           | 344  | 8.89   | 3.38  | 0.14        | 0.26        | -0.0744         | 0.3330        | 494    | 10.39  | 2.79  | 0.04        | -0.3219         | 0.7197        |
| WISC    | Performance    | Object assembly                  | 343  | 9.38   | 3.04  | 0.18        | 0.15        | -0.9593         | -0.3631       | 463    | 10.28  | 3.65  | 0.04        | -0.08437        | -0.2592       |
| WISC    | Performance    | Picture arrangement              | 344  | 10.05  | 3.74  | 0.09        | 0.12        | 0.2627          | -0.5957       | 491    | 9.81   | 4.62  | -0.09       | -0.08769        | 0.5036        |
| WISC    | Performance    | Picture completion               | 370  | 9.90   | 2.86  | 0.14        | 0.11        | 0.8911          | -0.6634       | 493    | 9.23   | 3.44  | 0.11        | -0.3290         | -0.1881       |
| WISC    | Memory         | Mazes                            | 334  | 9.20   | 3.64  | 0.16        | 0.13        | 0.0713          | 0.7868        | NT     |        |       |             |                 |               |
| WISC    | Memory         | Symbols                          | 340  | 9.54   | 3.41  | 0.19        | 0.26        | -0.1505         | 0.8106        | NT     |        |       |             |                 |               |

**TABLE S2 cont. - Association of *CMIP* and *ATP2C2* with additional language measures**

| Battery      | Scale      | Test                            | SLIC |       |       |          |          |                |            | ALSPAC |       |      |          |                |                |
|--------------|------------|---------------------------------|------|-------|-------|----------|----------|----------------|------------|--------|-------|------|----------|----------------|----------------|
|              |            |                                 | N    | Mean  | SD    | Sib Corr | NWR corr | ATP2C2 assoc   | CMIP assoc | N      | Mean  | SD   | NWR corr | ATP2C2 assoc   | CMIP assoc     |
| CELF         |            | Total language score            | 441  | 81.39 | 16.76 | 0.20     | 0.53     | <b>-0.0352</b> | 0.0963     | NT     |       |      |          |                |                |
| CELF         |            | Expressive language composite   | 442  | 77.64 | 15.50 | 0.15     | 0.55     | -0.0918        | -0.254     | NT     |       |      |          |                |                |
| CELF         | Expressive | Formulating sentences           | 428  | 5.62  | 2.52  | 0.14     | 0.40     | <b>-0.0395</b> | -0.6832    | NT     |       |      |          |                |                |
| CELF         | Expressive | Recalling sentences             | 428  | 6.77  | 3.09  | 0.24     | 0.56     | -0.0592        | -0.1627    | NT     |       |      |          |                |                |
| CELF         | Expressive | Sentence assembly               | 359  | 8.09  | 2.57  | 0.20     | 0.31     | -0.7951        | -0.0763    | NT     |       |      |          |                |                |
| CELF         |            | Receptive language composite    | 442  | 87.21 | 18.00 | 0.21     | 0.47     | <b>-0.0449</b> | 0.0805     | NT     |       |      |          |                |                |
| CELF         | Receptive  | Oral directions                 | 429  | 8.10  | 3.13  | 0.13     | 0.45     | <b>-0.0064</b> | 0.0535     | NT     |       |      |          |                |                |
| CELF         | Receptive  | Semantic relations              | 360  | 8.61  | 3.16  | 0.28     | 0.40     | -0.408         | 0.3878     | NT     |       |      |          |                |                |
| CELF         | Receptive  | Word classes                    | 364  | 8.19  | 3.18  | 0.12     | 0.41     | <b>0.0446</b>  | 0.2339     | NT     |       |      |          |                |                |
| NWR          |            | Total nonword repetition        | 503  | 91.48 | 20.11 | 0.38     |          | <b>-0.0003</b> | 0.3446     | 491    | 6.87  | 2.41 |          | <b>-0.0079</b> | <b>-0.0182</b> |
| NWR          | Syllables  | Nonword repetition, 3 syllables | NT   |       |       |          |          |                |            | 491    | 2.86  | 1.00 | 0.68     | -0.1894        | -0.09041       |
| NWR          | Syllables  | Nonword repetition, 4 syllables | NT   |       |       |          |          |                |            | 491    | 2.12  | 1.09 | 0.76     | -0.3312        | -0.2695        |
| NWR          | Syllables  | Nonword repetition, 5 syllables | NT   |       |       |          |          |                |            | 491    | 1.88  | 1.16 | 0.78     | <b>-0.0006</b> | <b>-0.0155</b> |
|              |            | Counting span                   | NT   |       |       |          |          |                |            | 475    | 3.34  | 0.85 | 0.22     | <b>-0.0143</b> | -0.3282        |
| WOLD         |            | Listening comprehension         | NT   |       |       |          |          |                |            | 494    | 6.84  | 2.36 | 0.16     | -0.2084        | -0.3005        |
| WORD/<br>N&B |            | Single word reading             | 345  | 92.20 | 15.68 | 0.30     | 0.56     | -0.2907        | -0.2969    | 548    | 26.81 | 9.14 | 0.45     | -0.4366        | 0.6713         |
| WORD         |            | Reading comprehension           | 198  | 90.48 | 17.46 | 0.46     | 0.48     | -0.4176        | 0.9815     | NT     |       |      |          |                |                |
| WORD/<br>N&B |            | Single word spelling            | 341  | 90.96 | 16.03 | 0.28     | 0.52     | -0.1116        | 0.6939     | 543    | 6.92  | 4.29 | 0.33     | 0.8855         | -0.7507        |
